# Supplementary material for: Key role of scale morphology in flatfishes (Pleuronectiformes) in the ability to keep sand
Source: PubMed Central journal article supplement (PMC4873799; doi:10.1038/srep26308), 2016-05-20
Supplement: srep26308-s1.pdf [file srep26308-s1.pdf]

# **Key role of scale morphology in flatfishes (Pleuronectiformes) in the ability to keep sand**

Marlene Spinner, Mareike Kortmann, Camille Traini, Stanislav N. Gorb

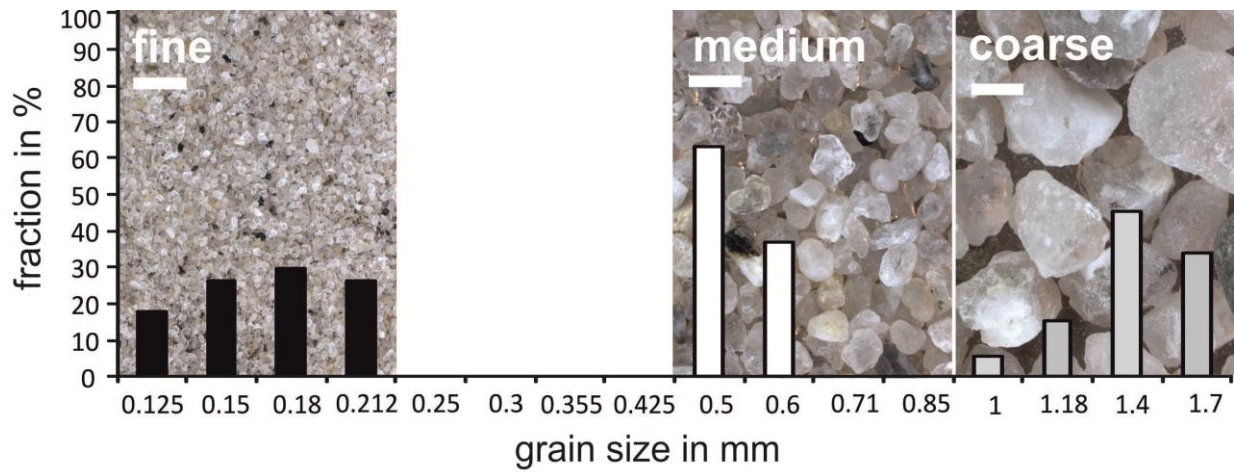

**S1. Light microscopy images and distribution of grain sizes of the used sediments.** Grain sizes (Wentworth classes): fine, coarse (here: medium), and very coarse sand (here: coarse) according to ISO 565 and ISO 3310 (R20/3 and R 40/3). The scale bars are 1 mm.

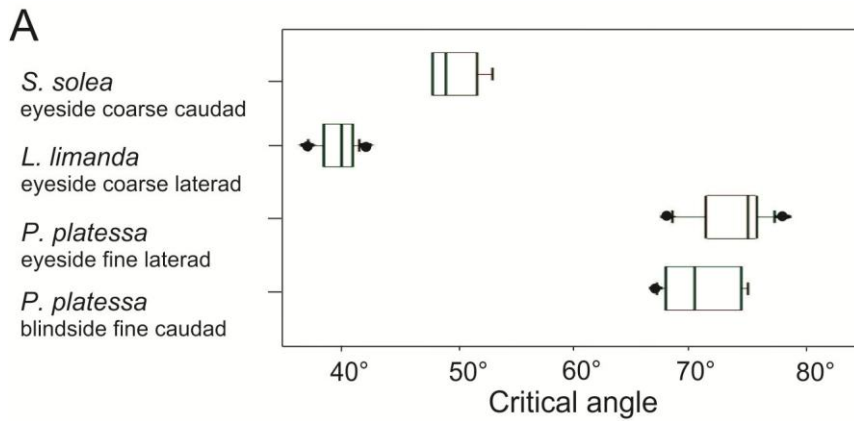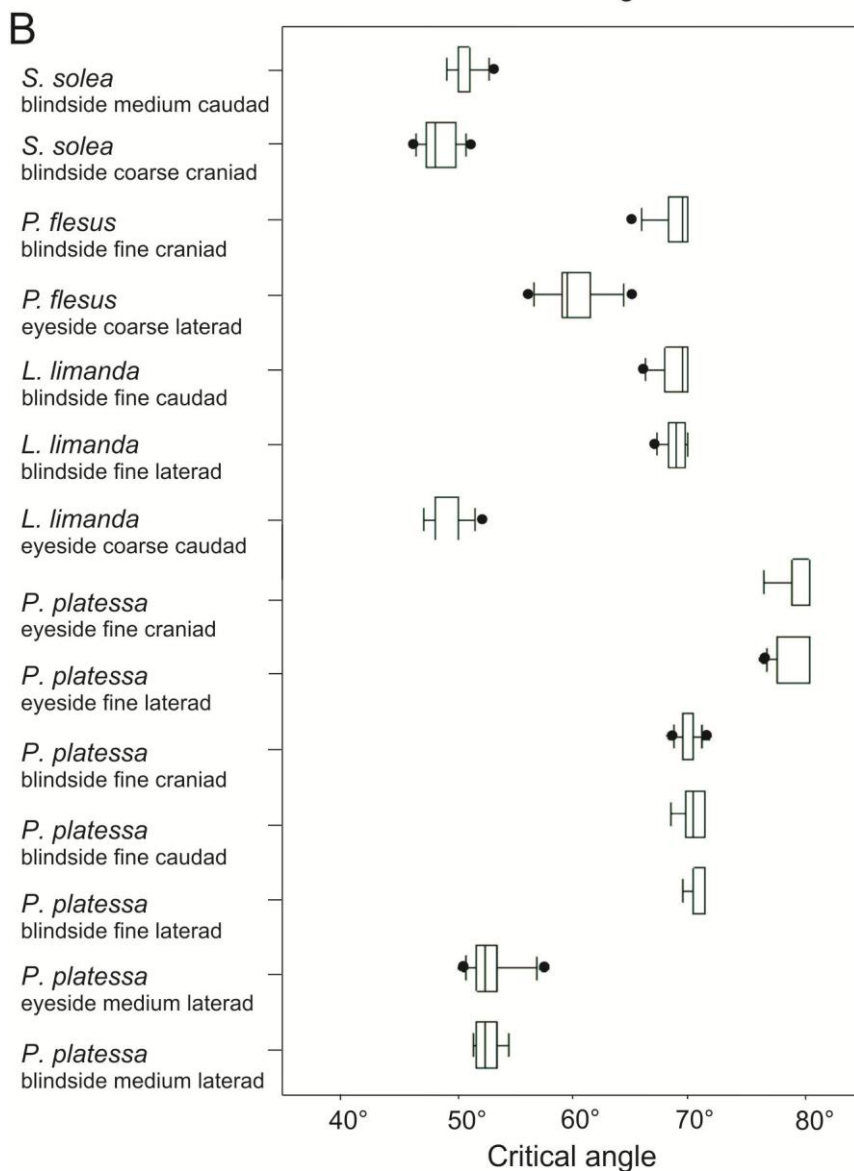

**S2. Box plot of CSAs of the three sediment types (fine, medium, and coarse) on original skin and resin replicas of the skin of the eye side and blind side of *S. solea*, *P. flesus*, *L. limanda*, and *P. platessa* in three directions: cranial, caudal and lateral. (A) Original skin. (B) Resin replicas of the the skin. The median is presented by a vertical line, the boxes indicate the upper and lower quartile. Minimum and maximum values and outliers are presented by error bars and dots.**

|                    | fine    |         | medium  |         | coarse  |         |
|--------------------|---------|---------|---------|---------|---------|---------|
|                    | ES      | BS      | ES      | BS      | ES      | BS      |
| <i>S. solea</i>    |         |         |         |         |         |         |
| craniad x caudad   | -       | -       | -       | -       | 5.384 * | 6.672 * |
| craniad x laterad  | -       | -       | -       | -       | 6.453 * | 5.165 * |
| caudad x laterad   | -       | -       | -       | -       | 1.069   | 1.507   |
| H                  | -       | -       | -       | -       | 24.168  | 24.623  |
| <i>P. flesus</i>   |         |         |         |         |         |         |
| craniad x caudad   | -       | -       | 5.522 * | 6.803 * | 4.956 * | 5.208 * |
| craniad x laterad  | -       | -       | 4.683 * | 3.402 * | 5.124 * | 4.998*  |
| caudad x laterad   | -       | -       | 0.840   | 3.402 * | 0.168   | 0.210   |
| H                  | -       | -       | 18.619  | 23.249  | 16.997  | 17.491  |
| <i>L. limanda</i>  |         |         |         |         |         |         |
| craniad x caudad   | -       | -       | 6.836 * | 6.288 * | 4.658 * | 6.014 * |
| craniad x laterad  | -       | -       | 5.000 * | 4.685 * | 7.179 * | 5.822 * |
| caudad x laterad   | -       | -       | 1.836   | 1.603   | 2.521   | 0.192   |
| H                  | -       | -       | 25.523  | 21.454  | 26.843  | 23.506  |
| <i>P. platessa</i> |         |         |         |         |         |         |
| craniad x caudad   | 3.699 * | 4.850 * | 6.233 * | 6.096 * | 4.631 * | 5.740 * |
| craniad x laterad  | 6.658 * | 5.137 * | 5.603 * | 5.740 * | 7.206 * | 6.096 * |
| caudad x laterad   | 2.959   | 0.288   | 0.630   | 0.356   | 2.576   | 0.356   |
| H                  | 24.422  | 17.846  | 23.712  | 23.487  | 26.761  | 23.533  |

**S3. Table: Direction-dependent difference of CSAs of sediments (fine, medium, coarse) on the eye (ES) and blind sides (BS) of the examined flatfish species.** H and q-values of Kruskal-Wallis One Way ANOVA on ranks (2 DF,  $P \leq 0.001$ ) and a subsequent pairwise multiple comparison Tukey test ( $P < 0.05$ ). Asterisks indicate significant differences.

|                    | craniad |         | caudad  |         | laterad |         |
|--------------------|---------|---------|---------|---------|---------|---------|
|                    | ES      | BS      | ES      | BS      | ES      | BS      |
| <i>S. solea</i>    |         |         |         |         |         |         |
| fine x medium      | 0.000   | 0.000   | 0.000   | 0.000   | 0.000   | 0.000   |
| fine x coarse      | 5.918 * | 5.918 * | 5.918 * | 5.918 * | 5.918 * | 5.918 * |
| medium x coarse    | 5.918 * | 5.918 * | 5.918 * | 5.918 * | 5.918 * | 5.918 * |
| H                  | 33.243  | 33.261  | 33.261  | 33.225  | 33.213  | 33.188  |
| <i>P. flesus</i>   |         |         |         |         |         |         |
| fine x medium      | 0.000   | 3.402 * | 3.402 * | 3.444 * | 3.402 * | 3.402 * |
| fine x coarse      | 5.103 * | 6.803 * | 6.803 * | 6.761 * | 6.803 * | 6.803 * |
| medium x coarse    | 5.103 * | 3.402 * | 3.402 * | 3.318 * | 3.402 * | 3.402 * |
| H                  | 24.658  | 24.029  | 24.076  | 23.820  | 24.067  | 24.061  |
| <i>L. limanda</i>  |         |         |         |         |         |         |
| fine x medium      | 0.986   | 4.124 * | 3.946 * | 3.946 * | 3.946 * | 3.946 * |
| fine x coarse      | 6.412 * | 7.713 * | 7.891 * | 7.891 * | 7.891 * | 7.891 * |
| medium x coarse    | 5.425 * | 3.589 * | 3.946 * | 3.946 * | 3.946 * | 3.946 * |
| H                  | 29.764  | 30.986  | 32.420  | 32.381  | 32.442  | 32.381  |
| <i>P. platessa</i> |         |         |         |         |         |         |
| fine x medium      | 3.946 * | 3.946 * | 3.946 * | 4.137 * | 3.973 * | 4.274 * |
| fine x coarse      | 7.891 * | 7.891 * | 7.891 * | 7.699 * | 7.864 * | 7.562 * |
| medium x coarse    | 3.946 * | 3.946 * | 3.946 * | 3.562 * | 3.891 * | 3.288   |
| H                  | 32.355  | 32.093  | 31.300  | 29.772  | 31.056  | 28.861  |

**S4, Table: Grain-size-dependent difference of CSAs of sediments on the eye side (ES) and blind side (BS) of the examined flatfish species.** H and q-values of Kruskal-Wallis One Way ANOVA on ranks (2 DF,  $P \leq 0.001$ ) and a subsequent pairwise multiple comparison Tukey test ( $P < 0.05$ ). Asterisks indicate significant differences.
